# Supplementary material for: Colors and dyes of archaeological textiles from Tarapacá in the Atacama Desert (South Central Andes)
Source: Research Square preprint supplement (doi:10.21203/rs.3.rs-233994/v1), 2021-02-25
Supplement: Supplementary file 1 [file 27c20d3f54411adcd9cd859c.docx]

**Table 2:**

| **Sample 13** | **Sample 4** | **Sample 11** | **Assignment** |
| --- | --- | --- | --- |
|
| 1647vw |  |  | υCO/ υCC |
|  |  | 1591sh | υCC/ υCO/ ipδNH |
|  | 1582vs | 1573s | υCC ring |
| 1519w | 1553 |  | υCC ring |
| 1475sh | 1472w | 1463w | ipδCH3/ipδCOH/υCC; δCH |
| 1455vs |  |  | υCC/δCOH/ δCH |
| 1370vw | 1397w |  | υCC/δCH |
|  |  | 1345m | υ(CC)/δ(CCC) |
| 1331vw |  |  | υCC |
|  | 1322s |  | δCOH/δCC; Amide III |
|  |  | 1295w | ring6 str., def. |
| 1258vs |  | 1257m | υCO/ υCC/ δCCC; *ρ*CHiph, asym/υCN/υCCring6/υCCring5 |
|  | 1249w |  | δCH |
| 1232w | 1224m | 1215w | δCH/δCCC; δCH |
| 1163vw |  | 1171w | υCC/δCH |
|  | 1149w |  | υCC/υCN; δCH |
| 1132m |  | 1128w | δNCH Pro |
| 1078vw | 1076w | 1081mw | υCC/δCOH; υCC prot |
|  | 1042w |  | υCN Pro |
|  | 1003m |  | Breathing ring Phe |
| 956vw | 963m |  | ρCC/δCCC; skeletal Pro |
|  | 923w | 933w | υC-COO- |
| 858vw | 872w | 896vw | ρCH3/δCCC; υCC ring Pro |
| 804s | 831 |  | υCC skel |
|  |  | 762vw | υCC ring |
|  | 731vs |  | ρ(CH3)/δCCC |
| 662m | 641s | 644vw | γCO/ γCH/γCOH/τ(CCCC); NCC def. |
| 620 mw |  | 614vw | SkelVibration |
| 567 m | 560w |  | Skel Vibration |
| 505w | 501w |  | Skel Vibration |
| 456s |  |  | Skel Vibration |
| 378mw | 389w |  | Skel Vibration |

Band description: w, weak; vw, very weak; m, medium; mw, medium weak; s, strong; vs, very strong. str. stretching; def., deformation; ip, in plane; op, out plane; breath., breathing; skel. skeletal; six-member rings, ring6; five-member rings, ring5; prot., protein; sh, shoulder; Pro, proline; Phe, phenylalanine;

Vibrational modes description: ν, stretching; δ, in the plane bending; γ out plane bending, ρ rocking, τ torsion.
